# Supplementary material
Source: Research Square preprint supplement (doi:10.21203/rs.3.rs-9437429/v1)
Supplement: Supplementary file 1 [file adcd8293c2b367b40b6fc347.docx]

| Fibroblast ID | Pedigree | Relationship to index | Historical nomenclature | Updated nomenclature |
| --- | --- | --- | --- | --- |
| 46572 |  | index (AR) | p.[Thr11Met];[Gly69Argfs*10] | p.[?]; [Gly58Argfs*10] |
| 48869 |  | index (AR) | p.[Asp18Gly];[Leu132Gln] | p.[Asp7Gly];[Leu121Gln] |
| 106298 | NBIA384 | index (AR) | p.[Gly65Val];[Gly65Val] | p.[Gly54Val];[Gly54Val] |
| 106299 | affected relative (AR) | p.[Gly65Val];[Gly65Val] | p.[Gly54Val];[Gly54Val] |
| 106300 | affected relative (AR) | p.[Gly65Val];[Gly65Val] | p.[Gly54Val];[Gly54Val] |
| 118245 | unaffected carrier | p.[Gly65Val];[=] | p.[Gly54Val];[=] |
| 118246 | unaffected carrier | p.[Gly65Val];[=] | p.[Gly54Val];[=] |
| 116351 | NBIA515 | index (AR) | p.[Gln97Pro];[Gly69Argfs*10] | p.[Gln86Pro];[Gly58Argfs*10] |
| 120563 | unaffected carrier | p.[Gln97Pro];[=] | p.[Gln86Pro];[=] |
| 120564 | unaffected carrier | p.[Gly69Argfs*10];[=] | p.[Gly58Argfs*10];[] |
| 116636 | NBIA510 | index (AR) | p.[Gly69Argfs*10];[Gly69Argfs*10] | p.[Gly58Argfs*10];[Gly58Argfs*10] |
| 116636-T-C19orf12 | Cell line 116636 with stable lentiviral addback of the C19orf12 gene | | |
| 118373 | unaffected carrier | p.[Gly69Argfs*10];[=] | p.[Gly58Argfs*10];[=] |
| 118374 | unaffected carrier | p.[Gly69Argfs*10];[=] | p.[Gly58Argfs*10];[=] |
| 116641 |  | index (AR) | p.[Gly69Argfs*10];[Gly69Argfs*10] | p.[Gly58Argfs*10];[Gly58Argfs*10] |
| 116673 |  | index (AR) | p.[Gly69Argfs*10];[Gly69Argfs*10] | p.[Gly58Argfs*10];[Gly58Argfs*10] |
| 117912 |  | index (AR) | p.[Gly58Ser]; [Gly58Ser] | p.[.Gly47Ser];[.Gly47Ser] |
| 118375 | NBIA#027 | index (AR) | p.[Thr11Met];[Gly69Argfs*10] | p.[?];[Gly58Argfs*10] |
| 118376 | unaffected carrier | p.[Thr11Met];[=] | p.[?];[=] |
| 118377 | unaffected carrier | p.[Gly69Argfs*10];[=] | p.[Gly58Argfs*10];[=] |
| 128054 |  | index (AD) | p.[Ala94Serfs*24];[=] | p.[Ala83Serfs*24];[=] |
| 128055 |  | index (AD) | p.[Met76Thrfs*3];[=] | p.[Met65Thrfs*3];[=] |
| Gdansk1 |  | index (AR) | p.[Leu23Pro];[Gly69Argfs*10] | p.[Leu12Pro];[Gly58Argfs*10] |
| Gdansk2 |  | index (AR) | p.[Gly54Valfs*19];[Gly69Argfs*10] | p.[Gly43Valfs*19];[Gly58Argfs*10] |
| Gdansk3 |  | index (AR) | p.[Gly69Argfs*10];[Gly69Argfs*10] | p.[Gly58Argfs*10];[Gly58Argfs*10] |
| NHDF (Lonza, #CC-2509) |  | Healthy individual | p.[=];[=] | p.[=];[=] |
| 33281 |  | Undiagnosed mitochondrial patient, PMID: 22499348 | p.[=];[=] | p.[=];[=] |
| Zamac |  | Healthy individual | p.[=];[=] | p.[=];[=] |
| GM09503 (Corriel) |  | Healthy individual | p.[=];[=] | p.[=];[=] |
| GM01652 (Corriell) |  | Healthy individual | p.[=];[=] | p.[=];[=] |
| 106-05A (Sigma) |  | Healthy individual | p.[=];[=] | p.[=];[=] |
| HDFa |  | Healthy individual | p.[=];[=] | p.[=];[=] |

**Supplementary Table 1.** Fibroblast Lines Used in This Study. Column descriptions: Fibroblast ID – Unique identifier assigned to each fibroblast line; Pedigree – Family information for patient and carrier fibroblasts derived from the same pedigree; Relationship and inheritance – Relationship to the index case and mode of MPAN inheritance, classified as autosomal recessive (AR) or autosomal dominant (AD); Historical mutation nomenclature – Previously reported mutation names; Updated nomenclature – Mutation names updated according to the canonical NP_113636.2 C19orf12 reference sequence.
