# Supplementary material
Source: Research Square preprint supplement (doi:10.21203/rs.3.rs-9437429/v1)
Supplement: Supplementary file 3 [file f779039f95f2f565cd99447f.docx]

| **Antibody** | **Brand** | **Concentration** | **Application** | **Additional info** |
| --- | --- | --- | --- | --- |
| Antibody Sampler Kit | #46486, Cell Signaling | 1:50 | WES | ULK1 Complex |
| Antibody Sampler Kit | #32345, Cell Signaling | 1:50 | WES | Atg12 Conjugation |
| Antibody Sampler Kit | #19848, Cell Signaling | 1:50 | WES | LC3 Conjugation |
| Antibody Sampler Kit | #70751, Cell Signaling | 1:50 | WES | Autophagy Vesicle Nucleation |
| p62 | sc-48402, Santa Cruz Biotechnology | 1:50 | WES |  |
| LAMP-2 | 49067S, Cell Signaling | 1:50 | WES |  |
| TFEB | 37785S, Cell Signaling | 1:50 | WES |  |
| Beclin1 | 3495S, Cell Signaling | 1:50 | WES |  |

**Supplementary Table 2.** List of antibodies applied for the analysis of autophagy and ferroptosis protein levels by capillary electrophoresis-based WES system, and final working concentrations
